# Supplementary material
Source: Springer Nature journal article supplement (https://www.springermedizin.de/resource/supplementary/13256_2009_1120_MOESM2_ESM.pdf/9647050)

1002252608

FRAME - 01

FOV - 00

FOV - 00

PT

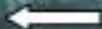

Supplement: MOESM2 [file 9647050]
